# Supplementary material for: Polymer wrapping-induced dispersion of single walled carbon nanotubes in ethylene glycol under mild sonication
Source: Royal Society of Chemistry journal article supplement (doi:10.1039/d0ra04061d), 2020-01-01
Supplement: d0ra04061d1.pdf [file d0ra04061d1.pdf]

Supporting Information

**Polymer Wrapping-Induced Dispersion of Single Walled Carbon Nanotubes in Ethylene Glycol under Mild Sonication**

*Dukeun Kim,<sup>1,a</sup> Taheon Lee,<sup>2,a</sup> Minho Kwon,<sup>2</sup> Hyun-jong Paik,<sup>3,\*</sup> Jong Hun Han,<sup>4</sup> Min Kang,  
<sup>1</sup> Jueun Choi, <sup>1</sup> Seung Ki Hong, <sup>1,5</sup> and Yoong Ahm Kim<sup>1,\*\*</sup>*

<sup>1</sup> Department of Polymer Engineering, Graduate School, School of Polymer Science and Engineering & Alan G. MacDiarmid Energy Research Institute, Chonnam National University, 77 Yongbong-ro, Buk-gu, Gwangju 61186, Republic of Korea

<sup>2</sup>Chemistry and Biochemistry, University of Arizona, Tucson 85719, USA

<sup>3</sup>Department of Polymer Science and Engineering, Pusan National University, San 30 Jangion2 dong, Geumjeong-gu, Busan 609-735, Republic of Korea

<sup>4</sup>School of Chemical Engineering and Optoelectronics Convergence Research Center, Chonnam National University, 77 Yongbong-ro, Buk-gu, Gwangju 61186, Republic of Korea

<sup>5</sup>Carbon Composite Material Research Center, Korea Institute of Science and Technology (KIST), Jeonbuk 55324, Republic of Korea

\*Corresponding author.

E-mail: hpaik@pusan.ac.kr (H.-j. Paik), yak@chonnam.ac.kr (Y.A. Kim)

<sup>a</sup> Both authors contributed to this work equally.

**Table S1.** Elemental composition of pristine and p(F7QD3)-adsorbed SWCNTs according to X-ray photoelectron spectra.

| I.D.                                  | C 1s (at %) | O 1s (at %) | N 1s (at %) | O/C ratio |
|---------------------------------------|-------------|-------------|-------------|-----------|
| Pristine SWCNTs                       | 80.7        | 17.0        | 2.29        | 0.21      |
| p(F7QD3)-adsorbed SWCNTs <sup>a</sup> | 84.4        | 15.6        | -           | 0.18      |

<sup>a</sup>p(F7QD3)-adsorbed SWCNTs was obtained by filtering p(F7QD3) dispersed SWCNT suspension and then drying it in vacuum.

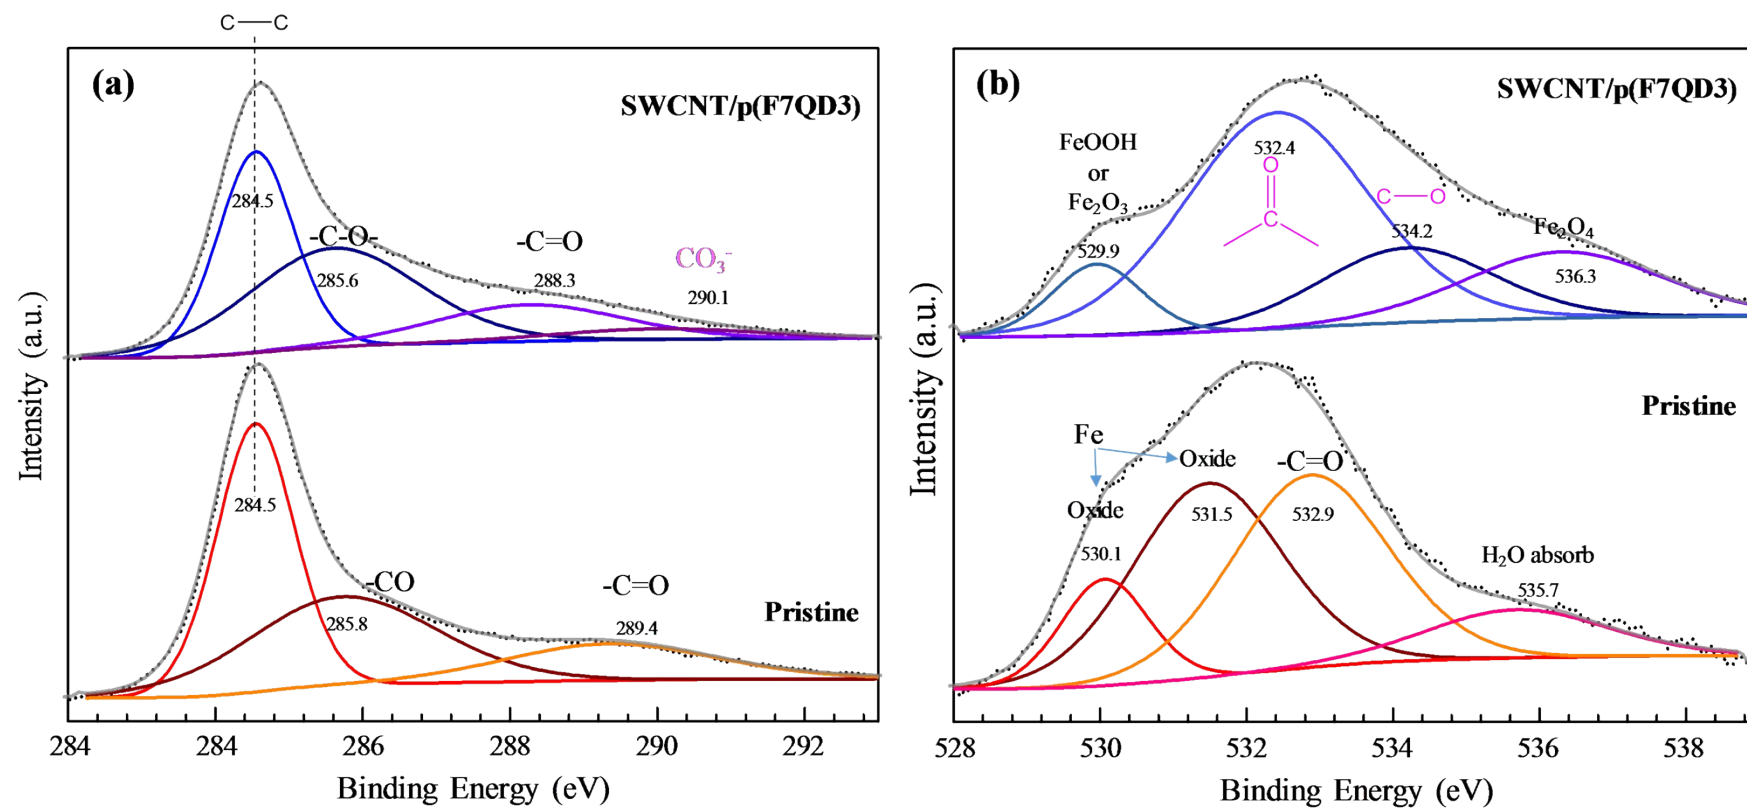

**Figure S1.** (a) C 1s and (b) O 1s X-ray photoelectron spectra of pristine and p(F7QD3)-adsorbed SWCNTs.

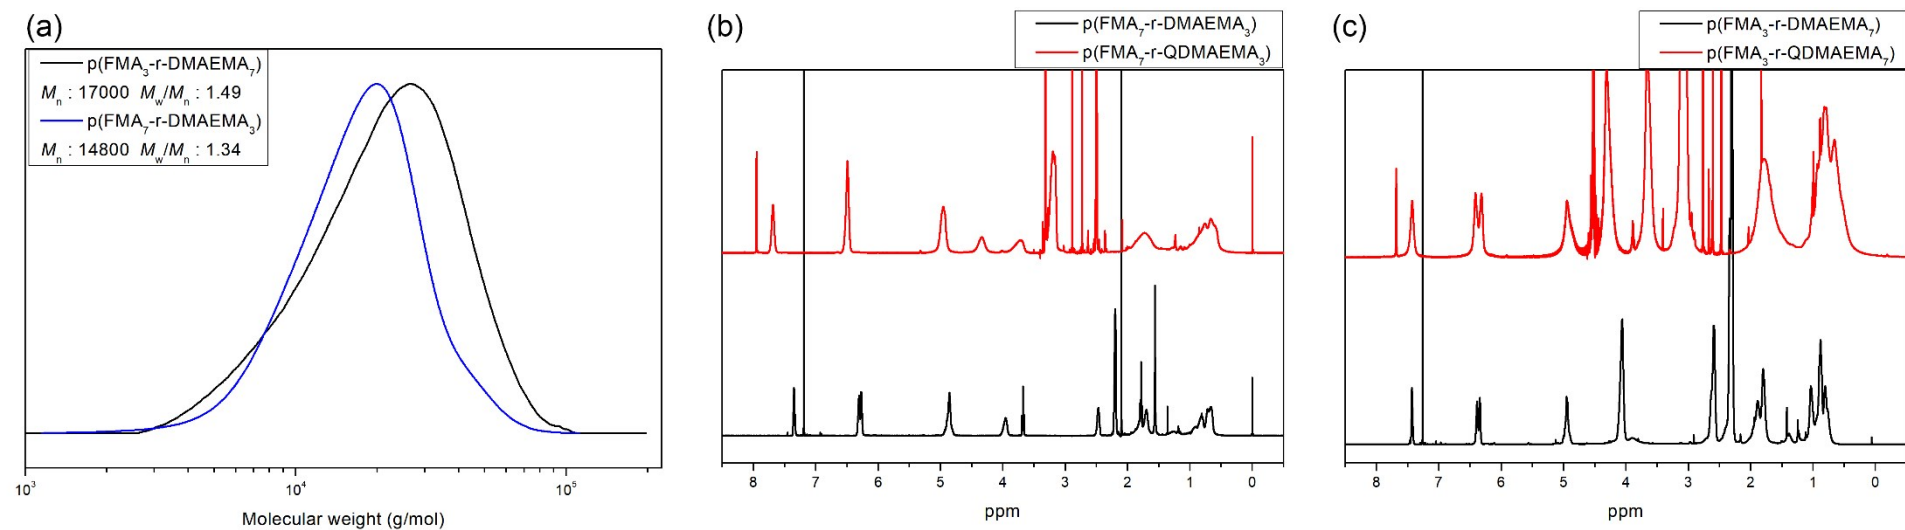

**Figure S2.** (a) GPC trace of the polymeric dispersants before the quaternization, NMR spectra of polymeric dispersants before and after quaternization for (b)  $p(\text{F7QD3})$  and (c)  $p(\text{F3QD7})$ , respectively.
